# Supplementary material for: Association of Planning Target Volume with Patient Outcome in Inoperable Stage III NSCLC Treated with Chemoradiotherapy: A Comprehensive Single-Center Analysis
Source: MDPI journal article supplement (doi:10.3390/cancers12103035), 2020-10-19
Supplement: s1 [file s1]

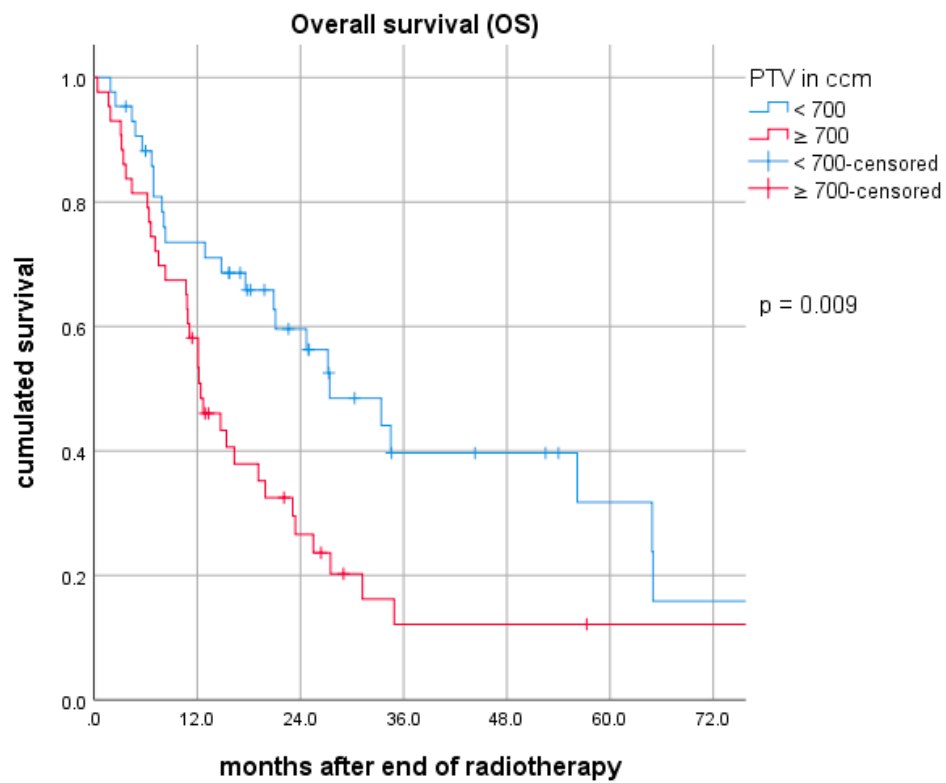

(A)

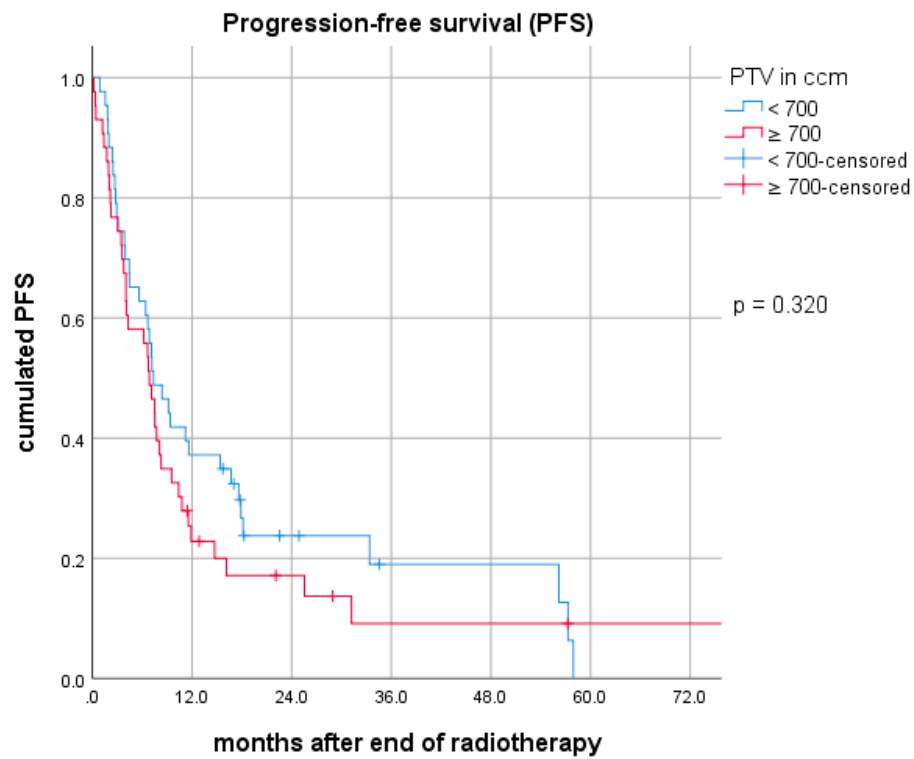

(B)

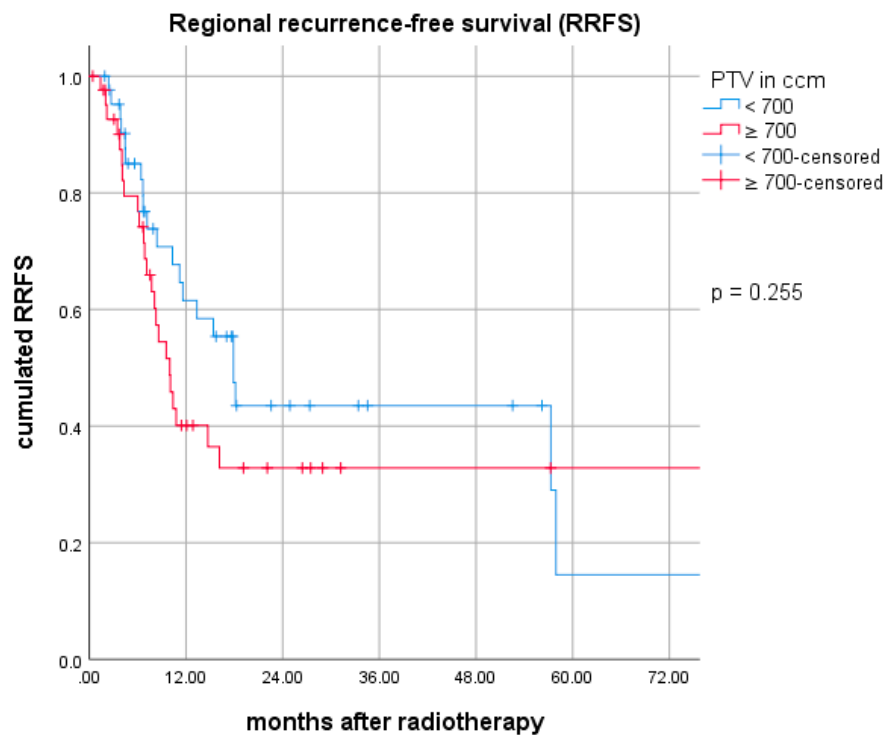

(C)

**Figure S1.** (A). Overall survival (OS) in the PSM cohort by PTV < 700 ccm vs. ≥700 ccm. (B). Progression-free survival (PFS) in the PSM cohort by PTV < 700 ccm vs. ≥700 ccm. (C). Regional recurrence-free survival (RRFS) in the PSM cohort by PTV < 700 ccm vs. ≥700 ccm.
